# Supplementary material for: Influence of heat transfer and wetting angle on condensable fluid flow through nanoporous anodic alumina membranes
Source: Royal Society of Chemistry journal article supplement (doi:10.1039/d2cp04577j), 2023-01-01
Supplement: d2cp04577j1.pdf [file d2cp04577j1.pdf]

**Supporting Information:**

**Influence of heat transfer and wetting angle on  
condensable fluid flow through nanoporous  
anodic alumina membranes**

Thomas Loimer,<sup>\*,†</sup> Stepan K. Podgolin,<sup>‡</sup> Javad Sodagar-Abardeh,<sup>†</sup> Dmitrii  
Petukhov,<sup>\*,¶</sup> and Andrei A. Eliseev<sup>‡</sup>

<sup>†</sup>*Institute of Fluid Mechanics and Heat Transfer, TU Wien, Austria*

<sup>‡</sup>*Department of Materials Science, Lomonosov Moscow State University, Russia*

<sup>¶</sup>*Department of Chemistry, Lomonosov Moscow State University, Russia*

E-mail: thomas.loimer@tuwien.ac.at; di.petukhov@gmail.com

Phone: +43 1 58801 32233

# List of Figures

|    |                                                                                                                                                                                                                                                                                    |     |
|----|------------------------------------------------------------------------------------------------------------------------------------------------------------------------------------------------------------------------------------------------------------------------------------|-----|
| S1 | Experimental cell. . . . .                                                                                                                                                                                                                                                         | S-3 |
| S2 | Permeance versus relative upstream pressure for a pore size of 18 nm. Contact angle of $0^\circ$ and boundary conditions: adiabatic, diabatic, $T_1 - T_2 = 0.7(T_1 - T_{2,\text{adiabatic}})$ . Flow of (a) isobutane and (b) freon 142b. . . . .                                 | S-4 |
| S3 | Permeance versus relative upstream pressure for a pore size of 18 nm. Contact angles of $0^\circ$ , $10^\circ$ , $30^\circ$ , $60^\circ$ , and $80^\circ$ , boundary condition $T_1 - T_2 = 0.7(T_1 - T_{2,\text{adiabatic}})$ . Flow of (a) isobutane and (b) freon 142b. . . . . | S-4 |
| S4 | Permeance versus relative upstream pressure for a pore size of 60 nm. Contact angle of $0^\circ$ and boundary conditions: adiabatic, diabatic, $T_1 - T_2 = 0.7(T_1 - T_{2,\text{adiabatic}})$ . Flow of (a) isobutane and (b) freon 142b. . . . .                                 | S-5 |
| S5 | Permeance versus relative upstream pressure for a pore size of 60 nm. Contact angles of $0^\circ$ , $10^\circ$ , $30^\circ$ , $60^\circ$ , and $80^\circ$ , boundary condition $T_1 - T_2 = 0.7(T_1 - T_{2,\text{adiabatic}})$ . Flow of (a) isobutane and (b) freon 142b. . . . . | S-5 |

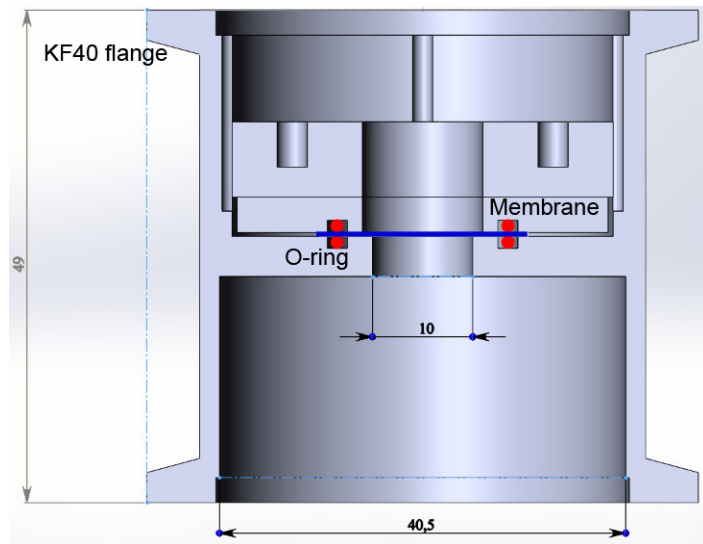

Figure S1: Experimental cell.

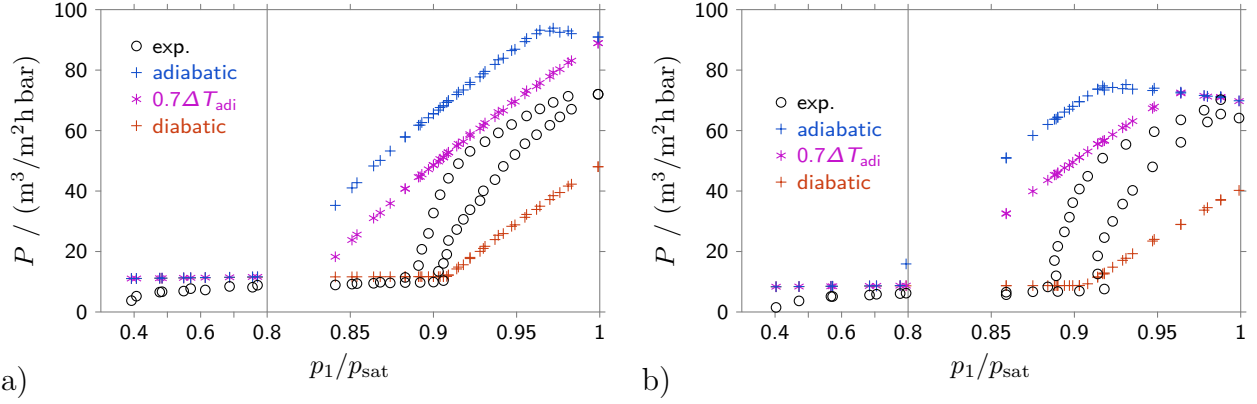

Figure S2: Permeance versus relative upstream pressure for a pore size of 18 nm. Contact angle of  $0^\circ$  and boundary conditions: adiabatic, diabatic,  $T_1 - T_2 = 0.7(T_1 - T_{2,\text{adiabatic}})$ . Flow of (a) isobutane and (b) freon 142b.

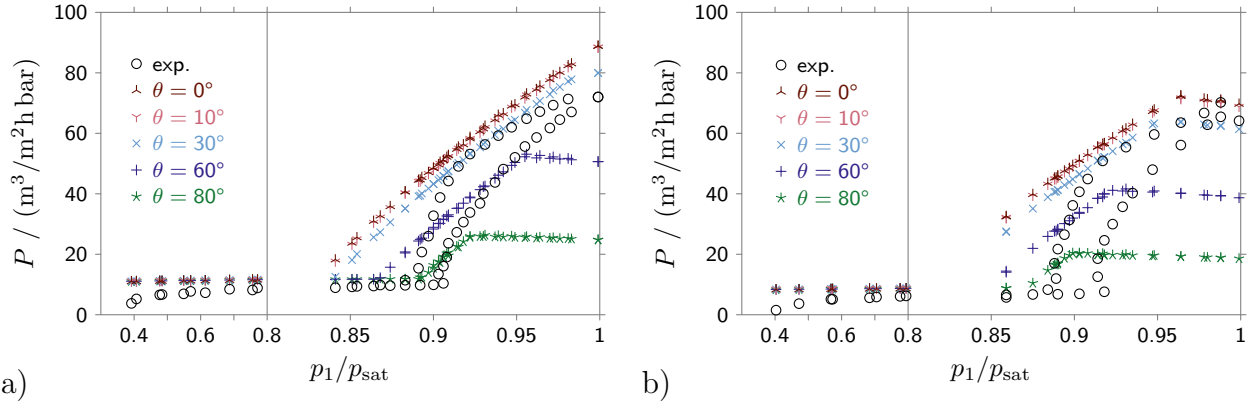

Figure S3: Permeance versus relative upstream pressure for a pore size of 18 nm. Contact angles of  $0^\circ$ ,  $10^\circ$ ,  $30^\circ$ ,  $60^\circ$ , and  $80^\circ$ , boundary condition  $T_1 - T_2 = 0.7(T_1 - T_{2,\text{adiabatic}})$ . Flow of (a) isobutane and (b) freon 142b.

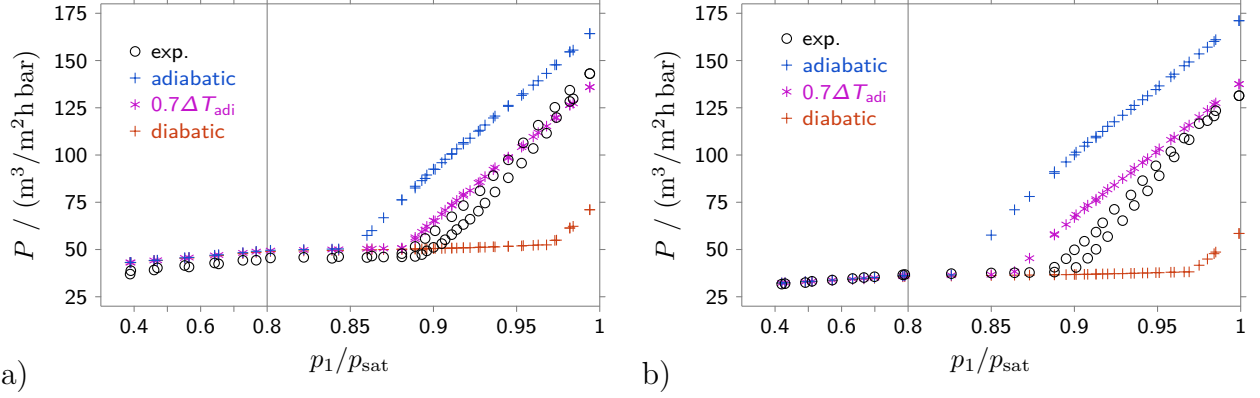

Figure S4: Permeance versus relative upstream pressure for a pore size of 60 nm. Contact angle of  $0^\circ$  and boundary conditions: adiabatic, diabatic,  $T_1 - T_2 = 0.7(T_1 - T_{2,\text{adiabatic}})$ . Flow of (a) isobutane and (b) freon 142b.

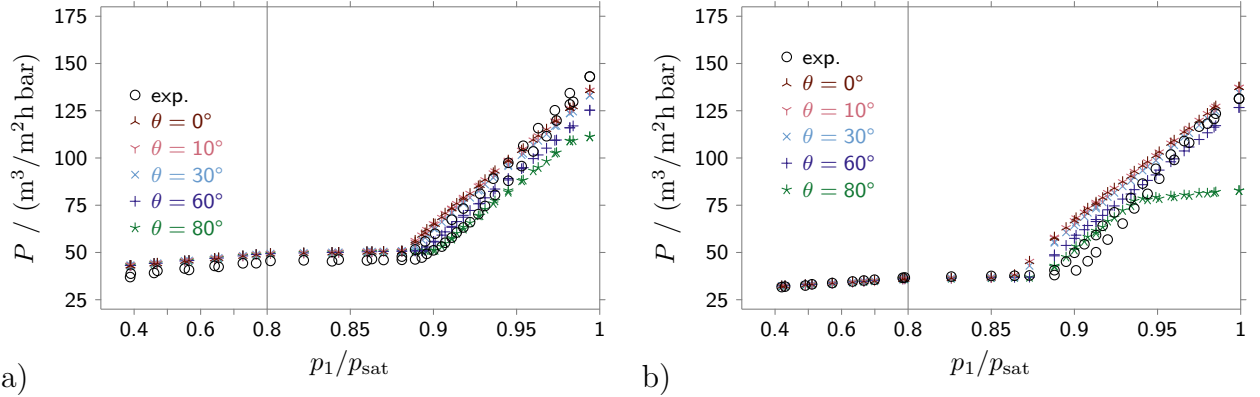

Figure S5: Permeance versus relative upstream pressure for a pore size of 60 nm. Contact angles of  $0^\circ$ ,  $10^\circ$ ,  $30^\circ$ ,  $60^\circ$ , and  $80^\circ$ , boundary condition  $T_1 - T_2 = 0.7(T_1 - T_{2,\text{adiabatic}})$ . Flow of (a) isobutane and (b) freon 142b.
